# Supplementary material for: Effect of Biostimulant, Manure Stabilizer, and Manure on Soil Physical Properties and Vegetation Status
Source: MDPI journal article supplement (doi:10.3390/plants13070920), 2024-03-22
Supplement: s1 [file s1]

**Supplementary Materials: Table S1.** Means and standard deviations of vegetation indices Normalized Difference Vegetation Index (NDVI), Moisture Stress Index (MSI), and Green Chlorophyll Index (GCI) for different variants of farmyard manure (FM), farmyard manure stabilized by Z'fix (FM\_ZF), of biostimulant NeOsol (NS), and control variant (CL) application in individual dates; lower case letters denote significant differences at probability level of 0.05 within each date separately; numbers in bold indicate the most favourable value.

| Date     | NDVI                     |                     |                          |                          |                     |                          | MSI                      |                    |                          |                          |                     |                          | GCI                      |                          |                     |                     |                          |                     |
|----------|--------------------------|---------------------|--------------------------|--------------------------|---------------------|--------------------------|--------------------------|--------------------|--------------------------|--------------------------|---------------------|--------------------------|--------------------------|--------------------------|---------------------|---------------------|--------------------------|---------------------|
|          | FM_Z<br>F_NS             | FM_ZF               | FM_NS                    | FM                       | NS                  | CL                       | FM_ZF_<br>NS             | FM_ZF              | FM_NS                    | FM                       | NS                  | CL                       | FM_ZF_<br>NS             | FM_ZF                    | FM_NS               | FM                  | NS                       | CL                  |
| 11. Jul. | 0.573 <sup>d</sup>       | 0.621 <sup>e</sup>  | 0.698 <sup>ab</sup>      | 0.716 <sup>bc</sup>      | 0.686 <sup>a</sup>  | <b>0.719<sup>c</sup></b> | 0.641 <sup>e</sup>       | 0.569 <sup>d</sup> | 0.473 <sup>c</sup>       | 0.452 <sup>ab</sup>      | 0.470 <sup>bc</sup> | <b>0.442<sup>a</sup></b> | <b>0.641<sup>e</sup></b> | 0.569 <sup>d</sup>       | 0.473 <sup>c</sup>  | 0.452 <sup>ab</sup> | 0.469 <sup>bc</sup>      | 0.443 <sup>a</sup>  |
| 2015     | ±0.065                   | ±0.072              | ±0.029                   | ±0.026                   | ±0.040              | ±0.037                   | ±0.072                   | ±0.076             | ±0.030                   | ±0.024                   | ±0.033              | ±0.033                   | ±0.072                   | ±0.076                   | ±0.030              | ±0.024              | ±0.033                   | ±0.033              |
| 3. Aug.  | 0.613 <sup>c</sup>       | 0.647 <sup>d</sup>  | 0.698 <sup>ab</sup>      | <b>0.707<sup>a</sup></b> | 0.683 <sup>b</sup>  | <b>0.707<sup>a</sup></b> | 0.574 <sup>c</sup>       | 0.509 <sup>b</sup> | 0.443 <sup>a</sup>       | 0.435 <sup>a</sup>       | 0.447 <sup>a</sup>  | <b>0.428<sup>a</sup></b> | <b>0.574<sup>c</sup></b> | 0.509 <sup>b</sup>       | 0.443 <sup>a</sup>  | 0.435 <sup>a</sup>  | 0.447 <sup>a</sup>       | 0.428 <sup>a</sup>  |
| 2015     | ±0.049                   | ±0.057              | ±0.029                   | ±0.308                   | ±0.043              | ±0.039                   | ±0.062                   | ±0.065             | ±0.032                   | ±0.035                   | ±0.043              | ±0.039                   | ±0.062                   | ±0.065                   | ±0.032              | ±0.035              | ±0.043                   | ±0.039              |
| 30. Aug. | 0.547 <sup>b</sup>       | 0.614 <sup>c</sup>  | 0.661 <sup>a</sup>       | 0.655 <sup>a</sup>       | 0.641 <sup>a</sup>  | <b>0.663<sup>a</sup></b> | 0.715 <sup>c</sup>       | 0.614 <sup>b</sup> | 0.555 <sup>a</sup>       | 0.556 <sup>a</sup>       | 0.561 <sup>a</sup>  | <b>0.540<sup>a</sup></b> | <b>0.715<sup>c</sup></b> | 0.614 <sup>b</sup>       | 0.555 <sup>a</sup>  | 0.556 <sup>a</sup>  | 0.561 <sup>a</sup>       | 0.540 <sup>a</sup>  |
| 2015     | ±0.090                   | ±0.059              | ±0.031                   | ±0.038                   | ±0.045              | ±0.042                   | ±0.106                   | ±0.078             | ±0.041                   | ±0.046                   | ±0.053              | ±0.049                   | ±0.106                   | ±0.777                   | ±0.041              | ±0.458              | ±0.053                   | ±0.049              |
| 17. Mar. | 0.336 <sup>b</sup>       | 0.331 <sup>b</sup>  | 0.357 <sup>a</sup>       | 0.359 <sup>a</sup>       | 0.352 <sup>a</sup>  | <b>0.381<sup>c</sup></b> | 0.951 <sup>c</sup>       | 0.963 <sup>c</sup> | 0.926 <sup>ab</sup>      | 0.931 <sup>a</sup>       | 0.936 <sup>a</sup>  | <b>0.915<sup>b</sup></b> | 0.951 <sup>c</sup>       | <b>0.963<sup>c</sup></b> | 0.926 <sup>ab</sup> | 0.931 <sup>a</sup>  | 0.936 <sup>a</sup>       | 0.915 <sup>b</sup>  |
| 2016     | ±0.026                   | ±0.027              | ±0.022                   | ±0.034                   | ±0.022              | ±0.032                   | ±0.035                   | ±0.042             | ±0.031                   | ±0.039                   | ±0.025              | ±0.036                   | ±0.035                   | ±0.042                   | ±0.042              | ±0.039              | ±0.025                   | ±0.036              |
| 27. Mar. | 0.405 <sup>b±</sup>      | 0.392 <sup>c±</sup> | 0.427 <sup>a</sup>       | <b>0.431<sup>a</sup></b> | 0.407 <sup>b</sup>  | 0.424 <sup>a</sup>       | 0.870 <sup>c</sup>       | 0.888 <sup>d</sup> | 0.849 <sup>ab</sup>      | 0.846 <sup>a</sup>       | 0.860 <sup>bc</sup> | <b>0.844<sup>a</sup></b> | 0.870 <sup>c</sup>       | <b>0.888<sup>d</sup></b> | 0.849 <sup>ab</sup> | 0.846 <sup>a</sup>  | 0.860 <sup>bc</sup>      | 0.844 <sup>a</sup>  |
| 2016     | 0.025                    | 0.025               | ±0.023                   | ±0.033                   | ±0.030              | ±0.028                   | ±0.032                   | ±0.035             | ±0.030                   | ±0.033                   | ±0.025              | ±0.026                   | ±0.032                   | ±0.035                   | ±0.030              | ±0.033              | ±0.025                   | ±0.026              |
| 9. May   | <b>0.762<sup>c</sup></b> | 0.723 <sup>a</sup>  | 0.750 <sup>bc</sup>      | 0.731 <sup>ab</sup>      | 0.672 <sup>d</sup>  | 0.734 <sup>ab</sup>      | <b>0.406<sup>b</sup></b> | 0.434 <sup>c</sup> | 0.416 <sup>ab</sup>      | 0.420 <sup>a</sup>       | 0.467 <sup>d</sup>  | 0.426 <sup>ac</sup>      | 0.406 <sup>b</sup>       | 0.434 <sup>c</sup>       | 0.416 <sup>ab</sup> | 0.420 <sup>a</sup>  | <b>0.466<sup>d</sup></b> | 0.426 <sup>ac</sup> |
| 2016     | ±0.025                   | ±0.038              | ±0.022                   | ±0.042                   | ±0.082              | ±0.028                   | ±0.023                   | ±0.018             | ±0.018                   | ±0.025                   | ±0.037              | ±0.035                   | ±0.023                   | ±0.018                   | ±0.018              | ±0.025              | ±0.037                   | ±0.035              |
| 8. Jun.  | <b>0.751<sup>a</sup></b> | 0.738 <sup>ab</sup> | 0.746 <sup>a</sup>       | 0.724 <sup>b</sup>       | 0.677 <sup>c</sup>  | 0.746 <sup>a</sup>       | <b>0.328<sup>a</sup></b> | 0.338 <sup>a</sup> | 0.333 <sup>a</sup>       | 0.372 <sup>b</sup>       | 0.401 <sup>c</sup>  | 0.338 <sup>a</sup>       | 0.328 <sup>a</sup>       | 0.338 <sup>a</sup>       | 0.333 <sup>a</sup>  | 0.372 <sup>b</sup>  | <b>0.401<sup>c</sup></b> | 0.338 <sup>a</sup>  |
| 2016     | ±0.024                   | ±0.026              | ±0.026                   | ±0.041                   | ±0.063              | ±0.027                   | ±0.018                   | ±0.022             | ±0.021                   | ±0.032                   | ±0.045              | ±0.031                   | ±0.018                   | ±0.022                   | ±0.021              | ±0.032              | ±0.045                   | ±0.031              |
| 11. May  | 0.879 <sup>c</sup>       | 0.886 <sup>c</sup>  | 0.903 <sup>ab</sup>      | 0.909 <sup>ab</sup>      | 0.900 <sup>a</sup>  | <b>0.911<sup>b</sup></b> | 0.373 <sup>d</sup>       | 0.358 <sup>c</sup> | 0.334 <sup>b</sup>       | 0.320 <sup>a</sup>       | 0.319 <sup>a</sup>  | <b>0.313<sup>a</sup></b> | <b>0.373<sup>d</sup></b> | 0.358 <sup>c</sup>       | 0.334 <sup>b</sup>  | 0.320 <sup>a</sup>  | 0.319 <sup>a</sup>       | 0.313 <sup>a</sup>  |
| 2017     | ±0.023                   | ±0.024              | ±0.015                   | ±0.019                   | ±0.026              | ±0.017                   | ±0.031                   | ±0.029             | ±0.022                   | ±0.025                   | ±0.029              | ±0.025                   | ±0.031                   | ±0.029                   | ±0.022              | ±0.025              | ±0.029                   | ±0.025              |
| 3. Jun.  | 0.866 <sup>c</sup>       | 0.873 <sup>b</sup>  | 0.878 <sup>ab</sup>      | 0.881 <sup>a</sup>       | 0.878 <sup>ab</sup> | <b>0.883<sup>a</sup></b> | 0.322 <sup>c</sup>       | 0.308 <sup>b</sup> | 0.298 <sup>a</sup>       | <b>0.293<sup>a</sup></b> | 0.296 <sup>a</sup>  | 0.298 <sup>a</sup>       | <b>0.322<sup>c</sup></b> | 0.308 <sup>b</sup>       | 0.298 <sup>a</sup>  | 0.293 <sup>a</sup>  | 0.296 <sup>a</sup>       | 0.298 <sup>a</sup>  |
| 2017     | ±0.015                   | ±0.012              | ±0.013                   | ±0.016                   | ±0.018              | ±0.018                   | ±0.020                   | ±0.013             | ±0.017                   | ±0.020                   | ±0.021              | ±0.019                   | ±0.020                   | ±0.013                   | ±0.017              | ±0.020              | ±0.021                   | ±0.019              |
| 20. Jun. | 0.726 <sup>a</sup>       | 0.730 <sup>a</sup>  | <b>0.737<sup>a</sup></b> | 0.729 <sup>a</sup>       | 0.706 <sup>b</sup>  | 0.698 <sup>b</sup>       | 0.442 <sup>a</sup>       | 0.422 <sup>b</sup> | <b>0.407<sup>a</sup></b> | 0.408 <sup>a</sup>       | 0.412 <sup>ab</sup> | 0.423 <sup>b</sup>       | <b>0.442<sup>c</sup></b> | 0.422 <sup>b</sup>       | 0.407 <sup>a</sup>  | 0.408 <sup>a</sup>  | 0.412 <sup>ab</sup>      | 0.423 <sup>b</sup>  |
| 2017     | ±0.036                   | ±0.038              | ±0.039                   | ±0.041                   | ±0.045              | ±0.053                   | ±0.027                   | ±0.022             | ±0.025                   | ±0.030                   | ±0.028              | ±0.030                   | ±0.027                   | ±0.022                   | ±0.025              | ±0.030              | ±0.028                   | ±0.307              |

|           |                          |                     |                          |                          |                          |                          |                          |                          |                          |                          |                     |                          |                          |                          |                     |                     |                          |                          |
|-----------|--------------------------|---------------------|--------------------------|--------------------------|--------------------------|--------------------------|--------------------------|--------------------------|--------------------------|--------------------------|---------------------|--------------------------|--------------------------|--------------------------|---------------------|---------------------|--------------------------|--------------------------|
| 28. Sept. | 0.601 <sup>a</sup>       | 0.636 <sup>b</sup>  | <b>0.692<sup>e</sup></b> | 0.620 <sup>ab</sup>      | 0.517 <sup>c</sup>       | 0.567 <sup>d</sup>       | 0.674 <sup>a</sup>       | 0.629 <sup>c</sup>       | <b>0.580<sup>b</sup></b> | 0.666 <sup>a</sup>       | 0.776 <sup>e</sup>  | 0.730 <sup>d</sup>       | 0.674 <sup>a</sup>       | 0.629 <sup>c</sup>       | 0.580 <sup>b</sup>  | 0.666 <sup>a</sup>  | <b>0.776<sup>d</sup></b> | 0.730 <sup>e</sup>       |
| 2017      | ±0.071                   | ±0.085              | ±0.060                   | ±0.063                   | ±0.074                   | ±0.089                   | ±0.071                   | ±0.082                   | ±0.064                   | ±0.068                   | ±0.082              | ±0.098                   | ±0.072                   | ±0.082                   | ±0.064              | ±0.068              | ±0.082                   | ±0.098                   |
| 15 Mar.   | 0.339 <sup>b</sup>       | 0.359 <sup>a</sup>  | <b>0.407<sup>d</sup></b> | 0.386 <sup>c</sup>       | 0.352 <sup>ab</sup>      | 0.367 <sup>a</sup>       | 0.883 <sup>e</sup>       | 0.816 <sup>ab</sup>      | <b>0.740<sup>d</sup></b> | 0.800 <sup>a</sup>       | 0.849 <sup>c</sup>  | 0.843 <sup>bc</sup>      | <b>0.883<sup>e</sup></b> | 0.816 <sup>ab</sup>      | 0.740 <sup>d</sup>  | 0.780 <sup>a</sup>  | 0.849 <sup>d</sup>       | 0.843 <sup>bc</sup>      |
| 2018      | ±0.029                   | ±0.033              | ±0.028                   | ±0.036                   | ±0.049                   | ±0.049                   | ±0.063                   | ±0.058                   | ±0.049                   | ±0.065                   | ±0.087              | ±0.079                   | ±0.063                   | ±0.058                   | ±0.049              | ±0.065              | ±0.087                   | ±0.079                   |
| 21. Apr.  | 0.712 <sup>ab</sup>      | 0.736 <sup>bc</sup> | <b>0.799<sup>d</sup></b> | 0.759 <sup>c</sup>       | 0.698 <sup>a</sup>       | 0.721 <sup>ab</sup>      | 0.548 <sup>a</sup>       | 0.476 <sup>b</sup>       | <b>0.413<sup>c</sup></b> | 0.457 <sup>b</sup>       | 0.529 <sup>a</sup>  | 0.517 <sup>a</sup>       | <b>0.548<sup>a</sup></b> | 0.476 <sup>b</sup>       | 0.413 <sup>c</sup>  | 0.457 <sup>b</sup>  | 0.529 <sup>a</sup>       | 0.517 <sup>a</sup>       |
| 2018      | ±0.072                   | ±0.070              | ±0.047                   | ±0.060                   | ±0.090                   | ±0.079                   | ±0.088                   | ±0.074                   | ±0.059                   | ±0.079                   | ±0.108              | ±0.084                   | ±0.088                   | ±0.074                   | ±0.059              | ±0.079              | ±0.108                   | ±0.084                   |
| 31. Oct.  | <b>0.316<sup>d</sup></b> | 0.299 <sup>b</sup>  | 0.296 <sup>b</sup>       | 0.275 <sup>c</sup>       | 0.254 <sup>a</sup>       | 0.253 <sup>a</sup>       | <b>1.120<sup>c</sup></b> | 1.153 <sup>d</sup>       | 1.168 <sup>a</sup>       | 1.177 <sup>ab</sup>      | 1.189 <sup>b</sup>  | 1.203 <sup>c</sup>       | 1.119 <sup>c</sup>       | 1.153 <sup>d</sup>       | 1.168 <sup>a</sup>  | 1.177 <sup>ab</sup> | 1.189 <sup>b</sup>       | <b>1.203<sup>e</sup></b> |
| 2018      | ±0.020                   | ±0.015              | ±0.012                   | ±0.013                   | ±0.016                   | ±0.016                   | ±0.034                   | ±0.027                   | ±0.033                   | ±0.033                   | ±0.026              | ±0.028                   | ±0.034                   | ±0.027                   | ±0.032              | ±0.033              | ±0.026                   | ±0.028                   |
| 15. Nov.  | <b>0.553<sup>c</sup></b> | 0.536 <sup>b</sup>  | <b>0.553<sup>c</sup></b> | 0.533 <sup>b</sup>       | 0.499 <sup>a</sup>       | 0.505 <sup>a</sup>       | <b>0.897<sup>a</sup></b> | 0.916 <sup>bc</sup>      | 0.909 <sup>ab</sup>      | 0.926 <sup>c</sup>       | 0.955 <sup>d</sup>  | 0.952 <sup>d</sup>       | 0.897 <sup>a</sup>       | 0.916 <sup>bc</sup>      | 0.909 <sup>ab</sup> | 0.926 <sup>c</sup>  | <b>0.955<sup>d</sup></b> | 0.952 <sup>d</sup>       |
| 2018      | ±0.011                   | ±0.016              | ±0.017                   | ±0.024                   | ±0.031                   | ±0.037                   | ±0.024                   | ±0.023                   | ±0.030                   | ±0.032                   | ±0.039              | ±0.041                   | ±0.024                   | ±0.023                   | ±0.030              | ±0.032              | ±0.039                   | ±0.041                   |
| 1. Apr.   | <b>0.700<sup>c</sup></b> | 0.629 <sup>a</sup>  | 0.663 <sup>b</sup>       | 0.663 <sup>b</sup>       | 0.624 <sup>a</sup>       | 0.631 <sup>a</sup>       | <b>0.635<sup>c</sup></b> | 0.686 <sup>b</sup>       | 0.674 <sup>a</sup>       | 0.668 <sup>a</sup>       | 0.689 <sup>b</sup>  | 0.707 <sup>d</sup>       | 0.635 <sup>c</sup>       | 0.686 <sup>b</sup>       | 0.674 <sup>a</sup>  | 0.668 <sup>a</sup>  | 0.689 <sup>b</sup>       | <b>0.707<sup>d</sup></b> |
| 2019      | ±0.029                   | ±0.018              | ±0.027                   | ±0.037                   | ±0.045                   | ±0.049                   | ±0.021                   | ±0.022                   | ±0.024                   | ±0.027                   | ±0.038              | ±0.040                   | ±0.021                   | ±0.022                   | ±0.024              | ±0.027              | ±0.038                   | ±0.040                   |
| 19. Apr.  | <b>0.743<sup>b</sup></b> | 0.681 <sup>c</sup>  | 0.706 <sup>a</sup>       | 0.729 <sup>b</sup>       | 0.703 <sup>a</sup>       | 0.699 <sup>a</sup>       | <b>0.529<sup>c</sup></b> | 0.584 <sup>b</sup>       | 0.573 <sup>ab</sup>      | 0.543 <sup>c</sup>       | 0.561 <sup>a</sup>  | 0.575 <sup>ab</sup>      | 0.529 <sup>c</sup>       | <b>0.584<sup>b</sup></b> | 0.573 <sup>ab</sup> | 0.544 <sup>c</sup>  | 0.561 <sup>a</sup>       | 0.575 <sup>ab</sup>      |
| 2019      | ±0.031                   | ±0.024              | ±0.040                   | ±0.045                   | ±0.047                   | ±0.047                   | ±0.029                   | ±0.024                   | ±0.032                   | ±0.037                   | ±0.042              | ±0.047                   | ±0.029                   | ±0.024                   | ±0.032              | ±0.037              | ±0.042                   | ±0.047                   |
| 3.Jul.    | 0.878 <sup>a</sup>       | 0.870 <sup>c</sup>  | 0.882 <sup>ab</sup>      | <b>0.885<sup>b</sup></b> | 0.876 <sup>a</sup>       | 0.881 <sup>ab</sup>      | 0.306 <sup>ab</sup>      | 0.311 <sup>b</sup>       | 0.292 <sup>cd</sup>      | <b>0.289<sup>c</sup></b> | 0.306 <sup>ab</sup> | 0.301 <sup>ad</sup>      | 0.306 <sup>ab</sup>      | <b>0.311<sup>b</sup></b> | 0.292 <sup>cd</sup> | 0.289 <sup>c</sup>  | 0.306 <sup>ab</sup>      | 0.301 <sup>ad</sup>      |
| 2019      | ±0.011                   | ±0.015              | ±0.017                   | ±0.015                   | ±0.020                   | ±0.014                   | ±0.018                   | ±0.019                   | ±0.022                   | ±0.023                   | ±0.030              | ±0.024                   | ±0.018                   | ±0.019                   | ±0.022              | ±0.023              | ±0.030                   | ±0.024                   |
| 31.Oct.   | 0.157 <sup>a</sup>       | 0.155 <sup>ab</sup> | 0.154 <sup>ab</sup>      | 0.153 <sup>b</sup>       | <b>0.158<sup>a</sup></b> | 0.155 <sup>ab</sup>      | <b>1.290<sup>b</sup></b> | 1.315 <sup>a</sup>       | 1.303 <sup>ab</sup>      | 1.306 <sup>ab</sup>      | 1.306 <sup>ab</sup> | 1.314 <sup>a</sup>       | 1.290 <sup>b</sup>       | <b>1.315<sup>a</sup></b> | 1.303 <sup>ab</sup> | 1.306 <sup>ab</sup> | 1.306 <sup>ab</sup>      | 1.314 <sup>a</sup>       |
| 2019      | ±0.010                   | ±0.009              | ±0.008                   | ±0.008                   | ±0.009                   | ±0.010                   | ±0.037                   | ±0.041                   | ±0.042                   | ±0.037                   | ±0.035              | ±0.035                   | ±0.037                   | ±0.041                   | ±0.042              | ±0.037              | ±0.035                   | ±0.035                   |
| 18. Apr.  | 0.558 <sup>b</sup>       | 0.566 <sup>b</sup>  | 0.588 <sup>c</sup>       | 0.602 <sup>a</sup>       | 0.601 <sup>a</sup>       | <b>0.608<sup>a</sup></b> | 0.764 <sup>c</sup>       | 0.755 <sup>c</sup>       | 0.726 <sup>d</sup>       | 0.710 <sup>b</sup>       | 0.705 <sup>ab</sup> | <b>0.699<sup>a</sup></b> | <b>0.764<sup>c</sup></b> | 0.755 <sup>c</sup>       | 0.726 <sup>d</sup>  | 0.710 <sup>b</sup>  | 0.705 <sup>ab</sup>      | 0.699 <sup>a</sup>       |
| 2020      | ±0.027                   | ±0.018              | ±0.024                   | ±0.035                   | ±0.037                   | ±0.040                   | ±0.024                   | ±0.015                   | ±0.024                   | ±0.029                   | ±0.023              | ±0.030                   | ±0.024                   | ±0.015                   | ±0.024              | ±0.029              | ±0.023                   | 0.030                    |
| 28.Apr.   | 0.550 <sup>ab</sup>      | 0.544 <sup>a</sup>  | 0.551 <sup>ab</sup>      | 0.548 <sup>ab</sup>      | 0.556 <sup>bc</sup>      | <b>0.567<sup>c</sup></b> | 0.575 <sup>ab</sup>      | <b>0.568<sup>a</sup></b> | 0.571 <sup>a</sup>       | 0.603 <sup>b</sup>       | 0.632 <sup>c</sup>  | 0.641 <sup>c</sup>       | 0.575 <sup>ab</sup>      | 0.568 <sup>a</sup>       | 0.571 <sup>a</sup>  | 0.603 <sup>b</sup>  | 0.632 <sup>c</sup>       | <b>0.641<sup>c</sup></b> |
| 2020      | ±0.021                   | ±0.019              | ±0.025                   | ±0.035                   | ±0.035                   | ±0.036                   | ±0.025                   | ±0.031                   | ±0.026                   | ±0.049                   | ±0.100              | ±0.116                   | ±0.025                   | ±0.031                   | ±0.026              | ±0.049              | ±0.100                   | ±0.115                   |
| 18.May    | 0.878 <sup>b</sup>       | 0.878 <sup>b</sup>  | 0.891 <sup>a</sup>       | 0.893 <sup>a</sup>       | 0.890 <sup>a</sup>       | <b>0.896<sup>a</sup></b> | 0.365 <sup>c</sup>       | 0.358 <sup>c</sup>       | 0.339 <sup>b</sup>       | 0.331 <sup>a</sup>       | 0.333 <sup>ab</sup> | <b>0.324<sup>d</sup></b> | <b>0.365<sup>c</sup></b> | 0.358 <sup>c</sup>       | 0.339 <sup>b</sup>  | 0.331 <sup>a</sup>  | 0.333 <sup>ab</sup>      | 0.324 <sup>d</sup>       |
| 2020      | ±0.011                   | ±0.010              | ±0.010                   | ±0.009                   | ±0.017                   | ±0.016                   | ±0.016                   | ±0.014                   | ±0.013                   | ±0.012                   | ±0.025              | ±0.022                   | ±0.016                   | ±0.014                   | ±0.013              | ±0.012              | ±0.025                   | ±0.022                   |
| 22.Jun.   | 0.879 <sup>a</sup>       | 0.882 <sup>a</sup>  | 0.882 <sup>a</sup>       | 0.881 <sup>a</sup>       | 0.882 <sup>a</sup>       | <b>0.887<sup>b</sup></b> | 0.322 <sup>e</sup>       | 0.316 <sup>c</sup>       | 0.312 <sup>bc</sup>      | 0.307 <sup>a</sup>       | 0.310 <sup>ab</sup> | <b>0.299<sup>d</sup></b> | <b>0.322<sup>e</sup></b> | 0.316 <sup>c</sup>       | 0.312 <sup>bc</sup> | 0.307 <sup>a</sup>  | 0.309 <sup>ab</sup>      | 0.299 <sup>d</sup>       |
| 2020      | ±0.006                   | ±0.005              | ±0.008                   | ±0.013                   | ±0.010                   | ±0.009                   | ±0.009                   | ±0.006                   | ±0.013                   | ±0.017                   | ±0.015              | ±0.012                   | ±0.009                   | ±0.006                   | ±0.013              | ±0.017              | ±0.015                   | ±0.012                   |
